1 **Left Hippocampus to Anterior Cingulate Cortex Connectivity Correlates with**  
2 **Worse Recent Verbal Memory in Pornography Addicted Juveniles**

3  
4 Pukovisa Prawiroharjo<sup>1\*</sup>; Rizki Edmi Edison<sup>2</sup>; Hainah Ellydar<sup>3</sup>; Peter Pratama<sup>4</sup>; Sitti  
5 Evangeline Imelda Suaidy<sup>3</sup>; Nya' Zata Amani<sup>3</sup>; Diavitri Carissima<sup>3-5</sup>; Ghina Faradisa  
6 Hatta<sup>4</sup>

7

8 <sup>1</sup> Neurology Department, Division of Neurobehavior, Faculty of Medicine,  
9 Universitas Indonesia/Cipto Mangokusumo Hospital, Jakarta, Indonesia

10

11 <sup>2</sup> Neuroscience Center, Universitas Muhammadiyah Prof. Dr. Hamka, Jakarta,  
12 Indonesia

13

14 <sup>3</sup> Yayasan Kita dan Buah Hati, Bekasi, Indonesia

15

16 <sup>4</sup> Independent scholar, Jakarta, Indonesia

17

18 <sup>5</sup> Faculty of Psychology, Universitas Islam Negeri Syarif Hidayatullah, Jakarta,  
19 Indonesia

20

21 \*Corresponding author

22 E-mail: [pukovisa@ui.ac.id](mailto:pukovisa@ui.ac.id)

23 **Funding sources**

24 This work was supported in part by Indonesian Ministry of Women's Empowerment  
25 and Child Protection (government-sponsored) and PuP gratefully acknowledges  
26 additional funding by LPDP for the Beasiswa Untuk Dosen Indonesia Luar Negeri  
27 2018-2021 scholarship (201711220411922). This study was funded without  
28 involvement of external funders in study design, data collection and analysis,  
29 decision to publish, or preparation of the manuscript.

30

31 **Competing interest**

32 The authors declare no competing interest exist.

33 Submission Type: **Research Article**

34 Abstract word count : **251**

35 Text word count : **3,238**

36 Title character count : **135**

37 Number of references : **44**

38 Number of tables : **1**

39 Number of figures : **3**

40

41 Rizki Edmi Edison [rizkiedmiedison@uhamka.ac.id](mailto:rizkiedmiedison@uhamka.ac.id) |

42 Hainah Ellydar [ellyrisman@yahoo.com](mailto:ellyrisman@yahoo.com) |

43 Peter Pratama [peter.pratama88@gmail.com](mailto:peter.pratama88@gmail.com) |

44 Sitti Evangeline Imelda Suaidy [evasuaidy@gmail.com](mailto:evasuaidy@gmail.com) |

45 Nya' Zata Amani [nyazataamani@gmail.com](mailto:nyazataamani@gmail.com) |

46 Diavitri Carissima [dcarissima@yahoo.com](mailto:dcarissima@yahoo.com) |

47 Ghina Faradisa Hatta [ghina.fhatta@gmail.com](mailto:ghina.fhatta@gmail.com)

48

49

50

51

52

53

54

55

56

57

58 **ABSTRACT**

59 **Background and aims:** Imperil by the convenience of information and knowledge  
60 access, children exposed to pornography have worsened. As such, this study aims to  
61 gain insight into brain connectivity and cognitive function effect of pornography  
62 addiction in juveniles, as the best of our knowledge, this study is the first to  
63 specifically learn about memory function in juvenile's pornography addiction.

64 **Methods:** We screened 30 juveniles with 4 dropouts (13 non-addiction vs 13  
65 addiction group). Subjects underwent neuropsychiatric tests (memory, attention, and  
66 intelligence) and fMRI image acquisition. We carried correlation analysis of brain  
67 connectivity and neuropsychiatric test results.

68 **Results:** Significant disconnection between left hippocampus to ACC (Z-  
69 transformed r-value, non-addiction vs addiction =  $0.07 \pm 0.19$  vs  $-0.08 \pm 0.17$ ,  
70  $p=0.04$ , cohen  $d=0.83$ ) followed by worse verbal recent memory in pornography  
71 addicted juveniles (RAVLT A6 sub-score,  $p < 0.01$ ,  $d=0.67$ ; A7 sub-score,  $p=0.01$ ).  
72 Attention and intelligence test resulted to insignificant correlation.

73 **Discussion:** This data-driven analysis result strongly promotes the involvement of  
74 cortico-subcortical systems in pornography addiction, emphasizing the role of reward  
75 system pathology, indifferent to addiction pathophysiology in general. Decline in  
76 working memory, which are maintained by corticolimbic network, including  
77 hippocampus and ACC, affects goal-oriented behaviour greatly. This, correspond to  
78 our significant result of addiction group's decline in memory, regardless of its  
79 association with attention and intelligence.

80 **Conclusion:** Disconnection between left hippocampus to ACC suggested similar  
81 neurobiological abnormalities as seen on other addictive disorders. Its disconnection

82 was also correlated with worse verbal recent memory in pornography addicted

83 juveniles, without affecting attention and intelligence, results showed.

84 **Keywords:** Addiction, Juvenile, Pornography, Brain Connectivity, Cognitive

85 Function

86

88 **ABBREVIATION LISTS**

89 ACC = Anterior Cingulate Cortex; ASAM = American Society of Addiction  
90 Medicine; dACC = Dorsal Anterior Cingulate Cortex; DMN = Default Mode  
91 Network; fMRI = Functional Magnetic Resonance Imaging; FOV = Field of View;  
92 ICA = Independent Component Analysis; MCC = Midcingulate Cortex; MNI =  
93 Montreal Neurological Institute; NFC = Negative Functional Connectivity; PCC =  
94 Posterior Cingulate Cortex; PFC = Prefrontal Cortex; RAVLT = Ray Auditory Verbal  
95 Learning Test; ROCFT = Ray-Osterrieth Complex Figure Test; ROI = Region of  
96 Interest; TE = Echo Time; TMT = Trail Making Test; TR = Repetition Time; WISC  
97 IQ = Wechsler Intelligence Scale for Children for IQ; YKBH = Yayasan Kita Dan  
98 Buah Hati

99

100 **INTRODUCTION**

101 Era of globalization, which eases access to information and knowledge through the  
102 Internet, has unfortunately exposed our children to pornography, intentionally or  
103 unintentionally. Unintentional exposure may risks from mistyping website addresses,  
104 searching for terms with or without sexual meaning, or accidentally encountering  
105 pop-up images and advertisements [1]. In virtue of this matter, it is important to  
106 consider developmental factors in cognitive processing, as children aged less than 7  
107 years old, have difficulty in differentiating between the on-screen and real-life  
108 situation. Incomplete cognitive development of children and adolescents may pose  
109 real risks in affecting how pornography itself is perceived and acted upon by children  
110 in their daily life, thus in turn may develop into problematic behaviours [2].  
111 Problematic sexual behaviour in young children aged under 12 years old are thought

112 to be the results of several factors, of which is pornography viewing, a study showed  
113 [3].

114 Studies in U.S. showed pornography exposure in children varies between studies,  
115 with unintentional exposure ranged from 19-34% [4 - 6], and intentional exposure  
116 43% [4]. Indonesia is no exception, in 2012, at least 50% Indonesian juveniles aged  
117 10-19 y.o. has viewed pornography contents, 14% intentionally exposed. This  
118 became worse in 2016, where at least 97% elementary students of 4–6<sup>th</sup> grade in  
119 Jakarta and its surrounding had been exposed to pornography [7].

120 Since long ago, substance addiction has gathered significant interests of both  
121 researchers and social activists. However, there are still very few studies concerning  
122 pornography addiction, especially in the field of neuroscience. Addiction are thought  
123 to be affiliated with the reward system of the brain, which involves emotion and  
124 executive functions of the brain--the amygdala, hippocampus, and frontal cortex [8,  
125 9]. Studies have found that dysfunction in prefrontal cortex (PFC), a region of brain,  
126 is accounted for the reduction in executive functions and behavioural inhibitory  
127 control [10 - 12]. Despite the lack of neuroscientific studies of pornography  
128 addiction, even more studies focusing on the younger population, a growing body of  
129 evidence suggests that the mechanism behind pornography addiction is indifferent of  
130 substance addiction, i.e. both involves disruption in PFC area [13 – 15]. The  
131 involvement of both emotion and executive functions in neurobiology of addiction  
132 are thought to be connected through the broader form of corticolimbic network, in  
133 which are anterior cingulate cortex (ACC), hippocampus, and prefrontal cortex  
134 (PFC) that may intercorrelate with each other [8, 16, 17].

135 As those affected areas turns into decline, it may affect its function, in this matter are  
136 the children's and adolescents' who have still substantial room of growth in life,

137 therefore may lead them to life with cognitive or behavioural problems. Studies also  
138 found that pornography addiction is among the causes of social problems [18,19].  
139 The lack of scientific studies addressing these arising problem of the youths concerns  
140 us. Therefore, this study aimed to use functional MRI in investigating brain  
141 connectivity, especially in the area of PFC, ACC, and hippocampus, which thought  
142 to be much affected; and its possible disruption of affiliated cognitive function—  
143 memory, intelligence, and attention---in pornography addicted juveniles.

144

## 145 **MATERIALS AND METHODS**

### 146 **Participants**

147 We used the data from 30 juveniles aged 12-16 years old from our previous study,  
148 recruited during December 2017-February 2018, in various events held by YKBH in  
149 Bekasi, Indonesia. Subjects were grouped into pornography addiction and non-  
150 addiction group, which were determined using Pornography Addiction Test, a  
151 battery of neuropsychological test designed and validated by YKBH [20]. Exclusion  
152 criteria were left-handed, incomplete tests/fMRI procedures, verbal or language  
153 disorder, history of brain-related disorder or disease, head trauma, trauma during  
154 pregnancy or birth, developmental, psychological or neurological disorder, or mental  
155 illness.

156

### 157 **Procedures**

158 All participants underwent pornography addiction screening, memory function  
159 assessment by Ray Auditory Verbal Learning Test (RAVLT) for auditory-verbal  
160 memory and Ray-Osterrieth Complex Figure Test (ROCFT) for visual memory,  
161 Wechsler Intelligence Scale for Children for IQ (WISC IQ), and fMRI image

162 acquisition. Each subject underwent MRI scanning using a 3-Tesla scanner (GE  
163 Advance Workstation 4.5). We first performed an initial scan to center the field of  
164 view on the subject's brain. We then performed a 3D T1-weighted turbo field echo  
165 scan for anatomical reference (repetition time [TR] = 8.3 ms; echo time [TE] = 3.2  
166 ms; FOV = 240 mm; matrix size = 256 × 256; slice thickness = 3.0 mm, space 1 mm).  
167 Lastly, we performed a gradient echo-planar sequence for functional imaging (TR =  
168 3000 ms; TE = 30 ms; flip angle = 90 degrees; FOV = 240 mm; 36 x 3 mm slices;  
169 space 1mm) which lasted for 7 minutes. Subjects were asked to refrain from any  
170 psychoactive substance use and sexual activity during the 24 hours preceding fMRI.

171

## 172 **Measures**

### 173 *Pornography Addiction Screening*

174 We completed the pornography addiction screening with a self-reported  
175 questionnaire, which developed by expert psychologist. Several indicators commonly  
176 found in juveniles with high pornography consumptions were emphasized, based on  
177 field studies and literature researches. Those are grouped into three dimensions: 1)  
178 time spent on pornography in the last six months, consisted of number of times,  
179 frequency, and duration spent; 2) motivation to use pornography, consisted of factors  
180 encouraging access to pornography, which includes sexual curiosity, emotional  
181 avoidance, sensation seeking, and sexual pleasure; and 3) problematic pornography  
182 use, consisted of functional and distress problems, excessive use, control difficulties,  
183 and using to escape negative emotions. The questionnaire consisted of 92 items and  
184 has been tested on 740 grade six to ten students in Indonesia, which further details  
185 corresponded in an unpublished report (**Table S1 and S2**). Three additional questions  
186 were added to minimize faking good possibility, thus we excluded subjects who



187 answered these according to social desire. Pornography addiction was defined as  
188 those with weighted score greater than or equal to 32. Psychometric analysis exhibited  
189 valid (CFA > 1.96) and reliable (Cronbach's Alpha > 0.7) for all items in the  
190 questionnaire.

191 Being specially developed and adapted to juveniles population, the questionnaire was  
192 very suitable for this pornography addiction study. Furthermore, the additional  
193 questions to exclude subjects who faked good and forced choice technique questions  
194 in this questionnaire allowed for less bias. The limitation of this questionnaire may be  
195 its number of questions, as it may induce fatigue and boredom on the subjects.

196 Although it being specially adapted to juveniles population made it very suitable for  
197 this study, its use in other context outside of juvenile pornography addiction may  
198 require wording adjustment to make a better understanding of the vocabularies used.

199

#### 200 *Memory Assessments*

201 All subjects underwent memory function assessment by Ray Auditory Verbal  
202 Learning Test (RAVLT) for auditory-verbal memory and Ray-Osterrieth Complex  
203 Figure Test (ROCFT) for visual memory. All subjects were first instructed to copy the  
204 figure in ROCFT sheet onto a blank paper. After the direct copy, subjects continued to  
205 undertake RAVLT. With a presentation rate of one word per second, the first 15  
206 noun-word list (Indonesian version) was read to participants (list A). Subsequently the  
207 presentation, subjects were requested to recall as many words as possible, regardless  
208 the word order. The steps were repeated 5 times, with each trial recall was recorded.  
209 Then, the next list (list B) was presented, subjects were also requested to recall as  
210 many words as possible. Promptly after recalling list B, the subjects were again  
211 requested to recall list A, twice, with 30 minutes interval in between (short recall, A6;

212 long recall, A7). Finishing the RAVLT, which would take approximately 30-40  
213 minutes to complete, all subjects were requested to reproduce the figure from memory  
214 of previous ROCFT. Attention, as a factor influencing working memory, [21,22] was  
215 evaluated using Trail Making Test (TMT) A and B. The subjects were instructed to  
216 connect a set of 25 dots of numbers (TMT A) and mix of numbers and letters,  
217 alternately (TMT B), after finishing each 8-dot-set-sample. The time taken of each set  
218 was recorded.

219

### 220 *Intelligence Measurements*

221 All subjects' intelligence were measured by Wechsler Intelligence Scale for Children  
222 for IQ (WISC IQ) that was designed for children between 5 and 16 years of age. The  
223 test consists of 10 basic tests and 2 supplementary tests. Basic tests comprise of verbal  
224 tests (information, vocabulary, arithmetic, comprehension and similarities) and  
225 performance tests (picture completion, picture arrangement, block design, object  
226 assembly, and digit symbol). Supplementary tests comprise of (verbal tests, digit  
227 span, performance test and maze).

228

### 229 **Analysis**

#### 230 *Imaging Analysis*

231 Data pre-processing followed a standard pipeline, consisting of realignment and  
232 unwarping, slice-timing correction, normalization, outlier detection, and finally  
233 spatially smoothing (full width at half maximum = 10 mm) which resulted in both  
234 functional and structural images in MNI-space. All were conducted using CONN  
235 toolbox version 17.f (<https://www.nitrc.org/projects/conn>) in SPM version 12  
236 (<http://www.fil.ion.ucl.ac.uk/spm/>). De-noising which consisted of removing white

237 matter and cerebrospinal fluid noise with 5 dimensions each, scrubbing, motion  
238 regression, band-pass filtering (0.01–0.10 Hz), and linear detrending was later  
239 performed. Nine nuisance covariates (time-series predictors for global signal, white  
240 matter, cerebrospinal fluid, and the six movement parameters) were sequentially  
241 regressed from the time-series.

242 Previous studies have shown patients with pornography addiction have impaired  
243 control and impulsivity, much associated with subcortical structures connectivity,  
244 such as hippocampus, putamen, and anterior cingulate cortex, thus were chosen as the  
245 seed regions and targets in ROI-to-ROI analysis (**Fig 1**).[8, 13, 23–26] Correlation  
246 map was produced by computing the Pearson linear correlation coefficients between  
247 the time course of signal in each ROI and the average signal of the seed. The process  
248 was calculated using CONN. To elucidate significant connection in each ROI-to-ROI  
249 group, one-sample T-Test were used. The ROI analysis would include the targets in  
250 cases where it was revealed significant connections between target and seed regions,  
251 which were defined anatomically from the MNI template.

252

253 **Fig 1.** ROI seed (left hippocampus, green) and target (ACC, red), from (a) superior  
254 view, and (b) left medial view.

255

256 To improve the normality of the distribution, we converted the correlation coefficients  
257 to Fisher's Z-transformed r-values. We then performed correlation analysis between  
258 the resulting Z-transformed r-values of significant ROI-to-ROI analysis (non-  
259 addiction vs addiction group) with the significant neuropsychiatric test and each  
260 domain sub-scores. For that purpose, we performed Spearman rank test.

261

262 *Statistical Analysis*

263 We used Mann-Whitney tests for comparison between groups. Correlation analysis  
264 was performed using Spearman rank test. Statistical significance was assumed on  
265 p-value of  $<0.05$ . Cohen d's effect size was also calculated for each result, assuming  
266 d-value of  $>0.2$  as small,  $>0.5$  as medium, and  $>0.8$  as large effect size. All statistical  
267 analysis was performed SPSS version 21.

268

269 **Ethical Approval**

270 The study was approved by Health Research Ethical Committee of Faculty of  
271 Medicine Universitas Indonesia (Clearance No. 1155/UN2.F1/ETIK/2017) and  
272 conducted in accordance to Helsinki Declaration. No subject was confronted with  
273 pornographic material in this study. Informed consent was obtained from all  
274 participants, represented by respective parents.

275

276 **Results**

277 *Demographic Data*

278 From the initial 30 subjects, 4 was dropped due to incomplete fMRI data, resulting in  
279 final 26 subjects (13 non-addiction vs 13 addiction group). Demographic and  
280 neuropsychiatric test results were shown in **Table 1**. Age was matched between both  
281 groups ( $p = 0.34$ ). Among memory test results, there was significant difference in  
282 RAVLT A6 subscore (non-addiction vs addiction,  $A6 = 14.08 \pm 1.12$  vs  $11.15 \pm$   
283  $2.19$ ,  $p < 0.01$ ,  $d = 1.68$ ) and A7 subscore ( $A7 = 14.23 \pm 0.93$  vs  $11.69 \pm 2.63$ ,  $p =$   
284  $0.01$ ,  $d = 1.28$ ). There was no significant difference between groups in other scores  
285 of RAVLT, ROCFT, TMT A, TMT B, and WISC IQ results.

286

287 **Table 1.** Demographic and neuropsychiatric tests comparison.

| 288 |                  | Non-Addiction  | Addiction      |       |
|-----|------------------|----------------|----------------|-------|
| 289 |                  | (n=13)         | (n=13)         | p     |
| 290 | Age              | 13.31 ± 1.03   | 13.77 ± 1.30   | 0.34  |
| 291 | Sex (F:M)        | 6:7            | 5:8            |       |
| 292 | RAVLT A6         | 14.08 ± 1.12   | 11.15 ± 2.19   | 0.00* |
| 293 | RAVLT A7         | 14.23 ± 0.93   | 11.69 ± 2.63   | 0.01* |
| 294 | ROCFT            | 24.12 ± 4.90   | 22.73 ± 6.57   | 0.76  |
| 295 | TMT A            | 39.38 ± 11.21  | 44.92 ± 15.64  | 0.43  |
| 296 | TMT B            | 86.31 ± 26.74  | 96.23 ± 56.16  | 0.70  |
| 297 | WISC Verbal IQ   | 102.46 ± 10.88 | 98.38 ± 13.85  | 0.44  |
| 298 | WISC Perform IQ  | 105.46 ± 10.50 | 102.77 ± 12.50 | 0.78  |
| 299 | WISC Full IQ     | 104.46 ± 9.04  | 98.77 ± 13.88  | 0.20  |
| 300 | WISC Original IQ | 114.44 ± 12.58 | 106.79 ± 19.97 | 0.26  |

301 \* statistically significant (p < 0.05)

302

### 303 *Brain Connectivity*

304 From ROI-to-ROI analysis in CONN with non-addiction>addiction contrast, we  
305 found one significant connection difference, which was left hippocampus to ACC (Z-  
306 transformed r-value, non-addiction vs addiction = 0.07 ± 0.19 vs -0.08 ± 0.17, p =  
307 0.04, d = 0.83) (**Fig 2**). Thence, it showed hypoconnectivity between hippocampus to  
308 ACC in addiction group.

309

310 **Fig 2.** Boxplot comparison of Left Hippocampus-ACC Z transformed r-values

311 connectivity between Non-Addiction and Addiction groups.

312

313 *Correlation Analysis*

314 We performed Spearman rank test between significant neuropsychiatric test  
315 (RAVLT A6 and A7 score) and Z-transformed r-value of significant connectivity  
316 (left hippocampus to ACC) in pornography addiction group, and found significant  
317 correlation with A6 ( $r = 0.43$ ,  $p = 0.04$ ,  $d = 0.67$ ) but not A7 ( $p = 0.10$ ) (**Fig 3**).

318

319 **Figure 3.** Scatterplot of Left Hippocampus-ACC Z transformed r-values  
320 connectivity with A6 score of RAVLT.

321

322 **Discussion**

323 Addiction is explained by American Society of Addiction Medicine (ASAM) as a  
324 primary, chronic disease of brain, related to reward, motivation, and memory circuit.  
325 Dysfunction of such circuit leads to characteristic biological, psychological, social  
326 and spiritual manifestations—thus reflected in an individual pathologically seeking  
327 reward and/or relief by substance use or other behaviours.[27]

328 In terms of addiction pathophysiology, emotion and cognitive function have long been  
329 ascribed taking part within. Mesolimbic dopamine pathway is thought affected the  
330 neurobiology of addiction. The pathway particularly connects with three other key  
331 regions to form integrated circuits, commonly called as the reward system: the  
332 amygdala (emotions, includes positive and negative, also emotional memory),  
333 hippocampus (long term memories processing and retrieval), and the frontal cortex  
334 (behaviour coordination). As aforementioned above, mesolimbic dopamine pathway  
335 takes a role in addiction and reward system. A study showed continued release of  
336 dopamine into the reward system in individual compulsively watching internet

337 pornography that it promotes neuroplastic changes reinforcing the experience.  
338 Excessive behaviours influenced neuroanatomical and reward system changes [8, 9].  
339 Taking part in the reward system, hippocampus is important for long-term memory,  
340 contextual, spatial, and emotional processing; whilst the executive function aspect  
341 was taken in by the frontal cortex [8, 16, 28–30]. PFC is particularly the key for  
342 aspects of working memory, temporal processing, decision making, flexibility and  
343 goal-oriented behaviour. As connectivity is a key determinant to functional  
344 intercourse within the brain, hippocampus-PFC's role has been ascribed in the broader  
345 form of corticolimbic network, in which anterior cingulate cortex (ACC),  
346 hippocampus, and PFC may intercorrelate with each other.[8, 16, 17] The cingulate  
347 cortex is divided into four functionally distinctive regions, which comprises of  
348 Broadmann's areas 24, 25, 32, and 33. It consists of the ACC, midcingulate cortex  
349 (MCC) or dorsal anterior cingulate cortex (dACC), posterior cingulate cortex (PCC),  
350 and retrosplenial cortex. Being a part of corticolimbic network, the cingulate cortex  
351 has role both in emotional and cognitive function. ACC and dACC in particular is  
352 thought to carry out reward-based decision making. It has been shown that ACC  
353 receives projections from structures that process rewards, i.e. striatum, mesolimbic  
354 dopamine system, dorsolateral prefrontal cortex, orbitofrontal cortex, and the  
355 supplementary and primary motor cortices [31, 32].  
356 Various evidence supports the interaction of hippocampus-PFC in reward learning,  
357 thus intercorrelate with addiction and impulsivity [17,33]. Particular region in  
358 hippocampus has been implicated in context-dependent process, which is the ventral  
359 subiculum of the hippocampus. Studies have shown its inactivation decreases  
360 reinstatement, thus marking its important role in drug-seeking behaviour [33]. Similar  
361 process has been shown in other kinds of addiction, i.e. game, internet, and

362 pornography addiction [8, 12, 17, 26, 34–36]. Decline in working memory affects  
363 goal-oriented behaviour greatly, as aforementioned maintained by PFC and  
364 corticolimbic network [8, 16], thus suggested the problem existence in pornography  
365 addiction [37].

366 As shown in both internet and drug addiction, studies showed a clear link between  
367 addiction and aberrant connectivity in response of inhibition network, resulting in  
368 behavioural disorder that fail to inhibit unwanted actions, thus associated with poor  
369 impulse control. Studies have revealed lower grey matter density, abnormal white  
370 matter fractional anisotropy, reduced orbitofrontal cortical thickness, impaired brain  
371 activity, and nonetheless decreased functional connectivity.[8, 38] A study showed  
372 rather increased functional connectivity in right hippocampus, and decreased  
373 functional connectivity in right dACC and left caudate in the DMN. This abnormal  
374 functional organization of the DMN are discussed as addiction-related increased  
375 memory processing with decreased cognitive control—thus once again implying lack  
376 of impulse control, self-monitoring, and attention [36].

377 Of various studies about addiction, many showed consistent findings in which  
378 decreased functional connectivity in reward processing circuit, nonetheless between  
379 hippocampus and ACC. Although drug addiction studies are appreciably more  
380 dominating than other kinds of addiction, similar findings have also been shown on  
381 other addictions, i.e. game, internet, and pornography addiction [8, 12, 17, 26, 34–36].

382 The first fMRI study focusing on internet pornography addiction was published in  
383 2014 and showed the same brain activity as seen in substance addicts and alcoholics  
384 [23].

385 Evidence of decreased brain functional connectivity is consistent with current models  
386 emphasizing the role of reward system pathology in addiction. This data-driven



387 analysis result strongly promotes the involvement of cortico-subcortical systems in  
388 pornography addiction as the fact it emerged as the prominent pathology. Thus,  
389 indicating similar neurobiological characteristics with other addictive disorders, as  
390 such subcortical regions may play the core role of brain network pathology.

391 Our study specifically enlisted juveniles as our focus of research, thus, being the first  
392 to specifically learn about memory function in juvenile's pornography addiction, we  
393 were unable to directly compare our results to previous studies. Thence, we attempted  
394 to compare our results with other related studies. Our correlation analysis showed  
395 significant results in RAVLT A6 and A7 sub-score. On the other hand, ROCFT,  
396 which was to assess visual memory, showed no significant results. Attention,  
397 considered as a factor influencing memory, also left with no significant results, as  
398 seen on TMT A and B results. Attention ensures the selection of information we  
399 received, and later selected to be brought into working memory from perception or  
400 long term memory. That is to say, the two compounds do affect each other [39].

401 Therefore, our results exhibited significant decline in memory in addiction group,  
402 regardless its association with attention considered. In addition, another cognitive test  
403 that was assessed was WISC IQ test, also left no significant result. Therefore, it  
404 showed that addiction affected visual-auditory memory of cognitive function without  
405 affecting intelligence.

406 To hold up our results, previous studies had also found lower working memory in  
407 substance addiction [40–42], but not pathological gambling [40, 41]. Study by Nie, et  
408 al also showing similar decline in verbal memory of internet addiction group [43]. To  
409 complement these results, we did correlation analysis and found significant  
410 correlation of left hippocampus to ACC hypoconnectivity to RAVLT A6 sub-score  
411 decline ( $r = 0.43$ ,  $p = 0.04$ ,  $d = 0.67$ ). Similar results of unaffected intelligence in

412 internet addiction and non-addiction group were also found by Park, et al, also tested  
413 with WISC IQ test with participants' mean age of 15.17 years old [44]. Considering  
414 its pathology similarities with pornography addiction [8, 23], their similar results may  
415 as well be regarded.

416 Our enrolment of juveniles participants serves both as our study's limitation and  
417 strength. As our population size (n = 13 of each group) was rather small, to avoid  
418 lacking in substantive significance, we also calculated the Cohen d's effect size of  
419 each result. The effect size calculations show that the sample size of our study is  
420 appropriate. Being the pioneer study of pornography addiction in juveniles, we aimed  
421 to serve information for the most critical phase, in which are still growing and  
422 developing juveniles' brains, thus might compensate underlying brain impairment.

423

#### 424 **Conclusion**

425 Our results suggest that adolescents with pornography addiction exhibit  
426 disconnection between left hippocampus to ACC that greatly play a role in reward  
427 system. This is consistent with other studies showing similar neurobiological  
428 abnormalities between pornography addiction and other addictive disorders. Given to  
429 its role in intelligence, memory, and learning, our results suggested that pornography  
430 addiction in juveniles correlates with worse verbal recent memory. Although, we did  
431 not find any significant correlation with intelligence and attention. Further research  
432 with larger population might aid to more defined results.

433

#### 434 **Supporting Information**

435 **Table S1. Mean performance on each of questionnaire's components and**  
436 **concurrent validity, as opposed to the three-step-norm.** The 92-item questionnaire  
437 was followed by interview as qualitative input as well as questionnaire about children

438 tendencies in sexual activities (**Table S2**) to confirm the screening (three-step-norm).  
439 Confirmatory factor analysis (CFA > 1.96) and Cronbach's Alpha (0.903; CA > 0.7)  
440 values showed its validity and reliability.

441

442 **Table S2. Children tendencies in sexual activities questionnaire.** It ranged from  
443 never to very frequent in a scale of 1 to 5. Minimum score of 11 and maximum score  
444 of 55.

445

#### 446 **Acknowledgements**

447 The authors would like to thank Alexandra Chessa, Resti Siti Saleha, Kevin Widjaja,  
448 and Nia Soewardi for their contributions in this paper.

449

#### 450 **Authors' contribution**

451 Conceptualization: PuP, REE, HE. Investigation: PuP, REE, HE, SEIS, NZA, DC.

452 Methodology: PuP. Formal analysis: PeP, GFH. Resources: HE, SEIS, NZA, DC.

453 Writing (draft preparation, review, and editing): PeP, GFH, PuP. All authors critically  
454 reviewed and approved the final version of the manuscript.

455

#### 456 **References**

457 [1] M. Flood, Exposure to pornography among youth in Australia, *J. Sociol.* 43

458 (2007) 45–60. <https://doi.org/10.1177/1440783307073934>.

459 [2] R.L. Collins, V.C. Strasburger, J.D. Brown, E. Donnerstein, A. Lenhart, L.M.

460 Ward, Sexual Media and Childhood Well-being and Health, *Pediatrics.* 140

461 (2017) S162–S166. <https://doi.org/10.1542/peds.2016-1758X>.

462 [3] R. Dillard, K. Maguire-Jack, K. Showalter, K.G. Wolf, M.M. Letson, Abuse

463 disclosures of youth with problem sexualized behaviors and trauma

464 symptomology, *Child Abuse Negl.* 88 (2019) 201–211.

- 465 <https://doi.org/10.1016/j.chiabu.2018.11.019>.
- 466 [4] K.J. Mitchell, M. Wells, Problematic Internet experiences: Primary or  
467 secondary presenting problems in persons seeking mental health care?, *Soc.*  
468 *Sci. Med.* 65 (2007) 1136–1141.  
469 <https://doi.org/10.1016/j.socscimed.2007.05.015>.
- 470 [5] S.A. Hardy, M.A. Steelman, S.M. Coyne, R.D. Ridge, Adolescent religiousness  
471 as a protective factor against pornography use, *J. Appl. Dev. Psychol.* 34  
472 (2013) 131–139. <https://doi.org/10.1016/j.appdev.2012.12.002>.
- 473 [6] J. Wolak, K. Mitchell, D. Finkelhor, Unwanted and Wanted Exposure to  
474 Online Pornography in a National Sample of Youth Internet Users, *Pediatrics.*  
475 119 (2007) 247–257. <https://doi.org/10.1542/peds.2006-1891>.
- 476 [7] Yayasan Kita dan Buah Hati, Data on Indonesian children’s exposure to  
477 pornography. [Data keterpaparan anak Indonesia terhadap pornografi], Jakarta,  
478 2016.
- 479 [8] T. Love, C. Laier, M. Brand, L. Hatch, R. Hajela, Neuroscience of Internet  
480 Pornography Addiction: A Review and Update, *Behav. Sci. (Basel).* 5 (2015)  
481 388–433. <https://doi.org/10.3390/bs5030388>.
- 482 [9] N.D. Volkow, G.-J. Wang, J.S. Fowler, D. Tomasi, F. Telang, Addiction:  
483 Beyond dopamine reward circuitry, *Proc. Natl. Acad. Sci.* 108 (2011) 15037–  
484 15042. <https://doi.org/10.1073/pnas.1010654108>.
- 485 [10] N.D. Volkow, G.-J. Wang, J.S. Fowler, D. Tomasi, F. Telang, R. Baler,  
486 Addiction: Decreased reward sensitivity and increased expectation sensitivity  
487 conspire to overwhelm the brain’s control circuit, *BioEssays.* 32 (2010) 748–  
488 755. <https://doi.org/10.1002/bies.201000042>.
- 489 [11] A. Verdejo-García, A. Bechara, E.C. Recknor, M. Pérez-García, Executive

- 490 dysfunction in substance dependent individuals during drug use and abstinence:  
491 An examination of the behavioral, cognitive and emotional correlates of  
492 addiction, *J. Int. Neuropsychol. Soc.* 12 (2006).  
493 <https://doi.org/10.1017/S1355617706060486>.
- 494 [12] R.Z. Goldstein, N.D. Volkow, Dysfunction of the prefrontal cortex in  
495 addiction: Neuroimaging findings and clinical implications, *Nat. Rev.*  
496 *Neurosci.* 12 (2011) 652–669. <https://doi.org/10.1038/nrn3119>.
- 497 [13] S. Kühn, J. Gallinat, Brain Structure and Functional Connectivity Associated  
498 With Pornography Consumption, *JAMA Psychiatry.* 71 (2014) 827.  
499 <https://doi.org/10.1001/jamapsychiatry.2014.93>.
- 500 [14] S. Kühn, J. Gallinat, Brains online: Structural and functional correlates of  
501 habitual Internet use, *Addict. Biol.* 20 (2015) 415–422.  
502 <https://doi.org/10.1111/adb.12128>.
- 503 [15] E.W. Owens, R.J. Behun, J.C. Manning, R.C. Reid, The Impact of Internet  
504 Pornography on Adolescents: A Review of the Research, *Sex. Addict.*  
505 *Compulsivity.* 19 (2012) 99–122.  
506 <https://doi.org/10.1080/10720162.2012.660431>.
- 507 [16] B.P. Godsil, J.P. Kiss, M. Spedding, T.M. Jay, The hippocampal–prefrontal  
508 pathway: The weak link in psychiatric disorders?, *Eur. Neuropsychopharmacol.*  
509 23 (2013) 1165–1181. <https://doi.org/10.1016/j.euroneuro.2012.10.018>.
- 510 [17] L. Ma, J.L. Steinberg, K.A. Cunningham, J.M. Bjork, S.D. Lane, J.M. Schmitz,  
511 T. Burroughs, P.A. Narayana, T.R. Kosten, A. Bechara, F.G. Moeller, Altered  
512 anterior cingulate cortex to hippocampus effective connectivity in response to  
513 drug cues in men with cocaine use disorder, *Psychiatry Res. Neuroimaging.*  
514 271 (2018) 59–66. <https://doi.org/10.1016/j.psychresns.2017.10.012>.

- 515 [18] D.P. Bryden, M.M. Grier, The search for rapists' "real" motives, *J. Crim. Law*  
516 *Criminol.* 101 (2011) 171–278.
- 517 [19] J.G. Kheswa, M. Notole, The impact of pornography on adolescent males'  
518 sexual behaviour in the Eastern Cape, South Africa: A qualitative study,  
519 *Mediterr. J. Soc. Sci.* 5 (2014) 2831.
- 520 [20] Yayasan Kita dan Buah Hati, Measuring tool for early detection of  
521 pornography addiction. [Alat ukur deteksi dini adiksi pornografi Yayasan Kita  
522 dan Buah Hati], Jakarta, 2017.
- 523 [21] N. Unsworth, K. Fukuda, E. Awh, E.K. Vogel, Working memory and fluid  
524 intelligence: Capacity, attention control, and secondary memory retrieval,  
525 *Cogn. Psychol.* 71 (2014) 1–26.  
526 <https://doi.org/10.1016/j.cogpsych.2014.01.003>.
- 527 [22] N. Cowan, The magical mystery four: How is working memory capacity  
528 limited, and why?, *Curr. Dir. Psychol. Sci.* 19 (2010) 51–57.  
529 <https://doi.org/10.1177/0963721409359277>.
- 530 [23] V. Voon, T.B. Mole, P. Banca, L. Porter, L. Morris, S. Mitchell, T.R. Lapa, J.  
531 Karr, N.A. Harrison, M.N. Potenza, M. Irvine, Neural Correlates of Sexual Cue  
532 Reactivity in Individuals with and without Compulsive Sexual Behaviours,  
533 *PLoS One.* 9 (2014) e102419. <https://doi.org/10.1371/journal.pone.0102419>.
- 534 [24] C.F. Ferris, C.T. Snowdon, J.A. King, J.M. Sullivan, T.E. Ziegler, D.P. Olson,  
535 N.J. Schultz-Darken, P.L. Tannenbaum, R. Ludwig, Z. Wu, A. Einspanier, J.T.  
536 Vaughan, T.Q. Duong, Activation of neural pathways associated with sexual  
537 arousal in non-human primates, *J. Magn. Reson. Imaging.* 19 (2004) 168–175.  
538 <https://doi.org/10.1002/jmri.10456>.
- 539 [25] B.A. Arnow, J.E. Desmond, L.L. Banner, G.H. Glover, A. Solomon, M.L.

- 540 Polan, T.F. Lue, S.W. Atlas, Brain activation and sexual arousal in healthy,  
541 heterosexual males, *Brain*. 125 (2002) 1014–1023.  
542 <https://doi.org/10.1093/brain/awf108>.
- 543 [26] M. Luijten, A.F. Schellekens, S. Kühn, M.W.J. Machielse, G. Sescousse,  
544 Disruption of Reward Processing in Addiction, *JAMA Psychiatry*. 74 (2017)  
545 387. <https://doi.org/10.1001/jamapsychiatry.2016.3084>.
- 546 [27] Public policy statement: definition of addiction, *Am. Soc. Addict. Med.* (2019).  
547 <http://www.asam.org/for-the-public/definition-of-addiction> (accessed April 15,  
548 2020).
- 549 [28] N. Zahr, E. Peterson, *Imaging the Addicted Brain*, Academic Press, California,  
550 2016.
- 551 [29] V.R. Preedy, *Neuropathology of Drug Addictions and Substance Misuse*,  
552 Academic Press, London, 2016. <https://doi.org/10.1016/C2013-0-14226-2>.
- 553 [30] S.W.F. Ewing, K. Witkiewitz, F.M. Filbey, *Neuroimaging and Psychosocial*  
554 *Addiction Treatment: An Integrative Guide for Researchers and Clinicians*,  
555 Springer, Toronto, 2015.
- 556 [31] B.Y. Hayden, M.L. Platt, Neurons in Anterior Cingulate Cortex Multiplex  
557 Information about Reward and Action, *J. Neurosci.* 30 (2010) 3339–3346.  
558 <https://doi.org/10.1523/JNEUROSCI.4874-09.2010>.
- 559 [32] B.A. Vogt, Midcingulate cortex: Structure, connections, homologies, functions  
560 and diseases, *J. Chem. Neuroanat.* 74 (2016) 28–46.  
561 <https://doi.org/10.1016/j.jchemneu.2016.01.010>.
- 562 [33] P. Belujon, A.A. Grace, Hippocampus, amygdala, and stress: interacting  
563 systems that affect susceptibility to addiction., *Ann. N. Y. Acad. Sci.* 1216  
564 (2011) 114–21. <https://doi.org/10.1111/j.1749-6632.2010.05896.x>.

- 565 [34] W. Ding, J. Sun, Y. Sun, Y. Zhou, L. Li, J. Xu, Y. Du, Altered Default  
566 Network Resting-State Functional Connectivity in Adolescents with Internet  
567 Gaming Addiction, *PLoS One*. 8 (2013) e59902.  
568 <https://doi.org/10.1371/journal.pone.0059902>.
- 569 [35] S.-B. Hong, A. Zalesky, L. Cocchi, A. Fornito, E.-J. Choi, H.-H. Kim, J.-E.  
570 Suh, C.-D. Kim, J.-W. Kim, S.-H. Yi, Decreased Functional Brain  
571 Connectivity in Adolescents with Internet Addiction, *PLoS One*. 8 (2013)  
572 e57831. <https://doi.org/10.1371/journal.pone.0057831>.
- 573 [36] N. Ma, Y. Liu, X.-M. Fu, N. Li, C.-X. Wang, H. Zhang, R.-B. Qian, H.-S. Xu,  
574 X. Hu, D.-R. Zhang, Abnormal Brain Default-Mode Network Functional  
575 Connectivity in Drug Addicts, *PLoS One*. 6 (2011) e16560.  
576 <https://doi.org/10.1371/journal.pone.0016560>.
- 577 [37] P. Prawiroharjo, H. Ellydar, P. Pratama, R.E. Edison, S.E.I. Suaidy, N.Z.  
578 Amani, D. Carissima, Impaired Recent Verbal Memory in Pornography-  
579 Addicted Juvenile Subjects, *Neurol. Res. Int.* 2019 (2019) 1–5.  
580 <https://doi.org/10.1155/2019/2351638>.
- 581 [38] B. Li, K.J. Friston, J. Liu, Y. Liu, G. Zhang, F. Cao, L. Su, S. Yao, H. Lu, D.  
582 Hu, Impaired Frontal-Basal Ganglia Connectivity in Adolescents with Internet  
583 Addiction, *Sci. Rep.* 4 (2015) 5027. <https://doi.org/10.1038/srep05027>.
- 584 [39] K. Oberauer, Working Memory and Attention – A Conceptual Analysis and  
585 Review, *J. Cogn.* 2 (2019). <https://doi.org/10.5334/joc.58>.
- 586 [40] N. Albein-Urios, J.M. Martínez-González, Ó. Lozano, L. Clark, A. Verdejo-  
587 García, Comparison of impulsivity and working memory in cocaine addiction  
588 and pathological gambling: Implications for cocaine-induced neurotoxicity,  
589 *Drug Alcohol Depend.* 126 (2012) 1–6.



- 590 <https://doi.org/10.1016/j.drugalcdep.2012.03.008>.
- 591 [41] W.-S. Yan, Y.-H. Li, L. Xiao, N. Zhu, A. Bechara, N. Sui, Working memory  
592 and affective decision-making in addiction: A neurocognitive comparison  
593 between heroin addicts, pathological gamblers and healthy controls, *Drug*  
594 *Alcohol Depend.* 134 (2014) 194–200.  
595 <https://doi.org/10.1016/j.drugalcdep.2013.09.027>.
- 596 [42] A. Bechara, E.M. Martin, Impaired Decision Making Related to Working  
597 Memory Deficits in Individuals With Substance Addictions.,  
598 *Neuropsychology.* 18 (2004) 152–162. [https://doi.org/10.1037/0894-](https://doi.org/10.1037/0894-4105.18.1.152)  
599 [4105.18.1.152](https://doi.org/10.1037/0894-4105.18.1.152).
- 600 [43] J. Nie, W. Zhang, J. Chen, W. Li, Impaired inhibition and working memory in  
601 response to internet-related words among adolescents with internet addiction:  
602 A comparison with attention-deficit/hyperactivity disorder, *Psychiatry Res.* 236  
603 (2016) 28–34. <https://doi.org/10.1016/j.psychres.2016.01.004>.
- 604 [44] M.-H. Park, E.-J. Park, J. Choi, S. Chai, J.-H. Lee, C. Lee, D.-J. Kim,  
605 Preliminary study of Internet addiction and cognitive function in adolescents  
606 based on IQ tests, *Psychiatry Res.* 190 (2011) 275–281.  
607 <https://doi.org/10.1016/j.psychres.2011.08.006>.
- 608
- 609

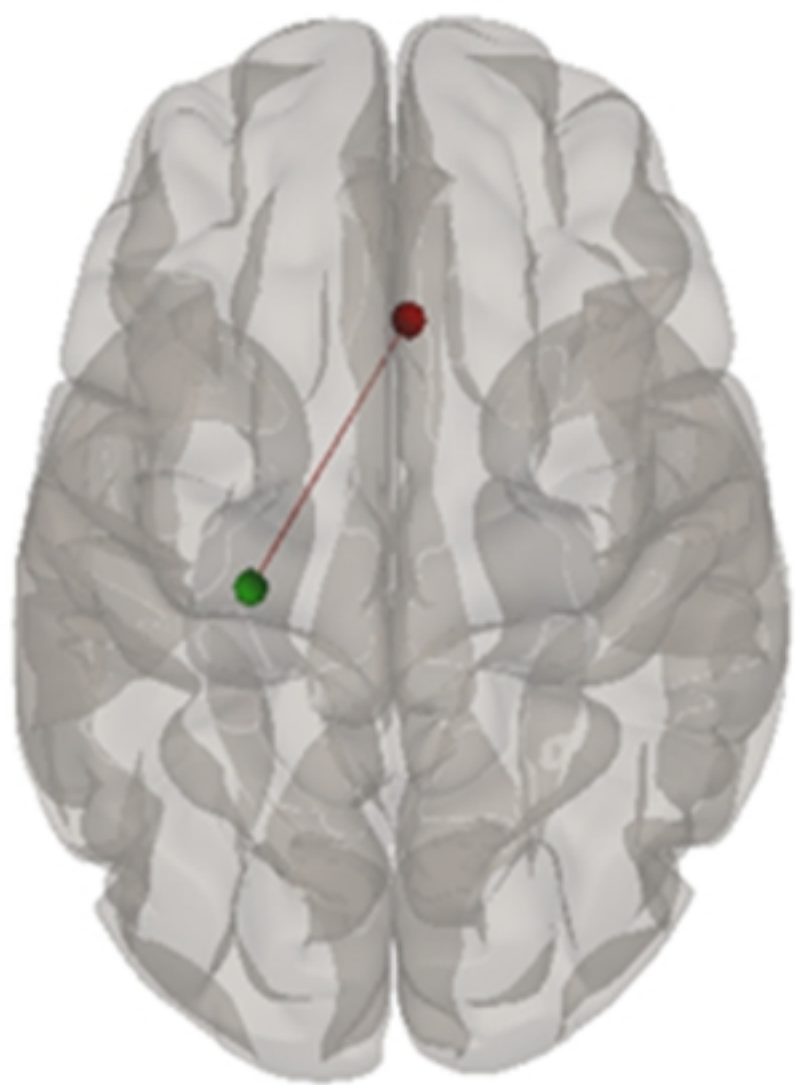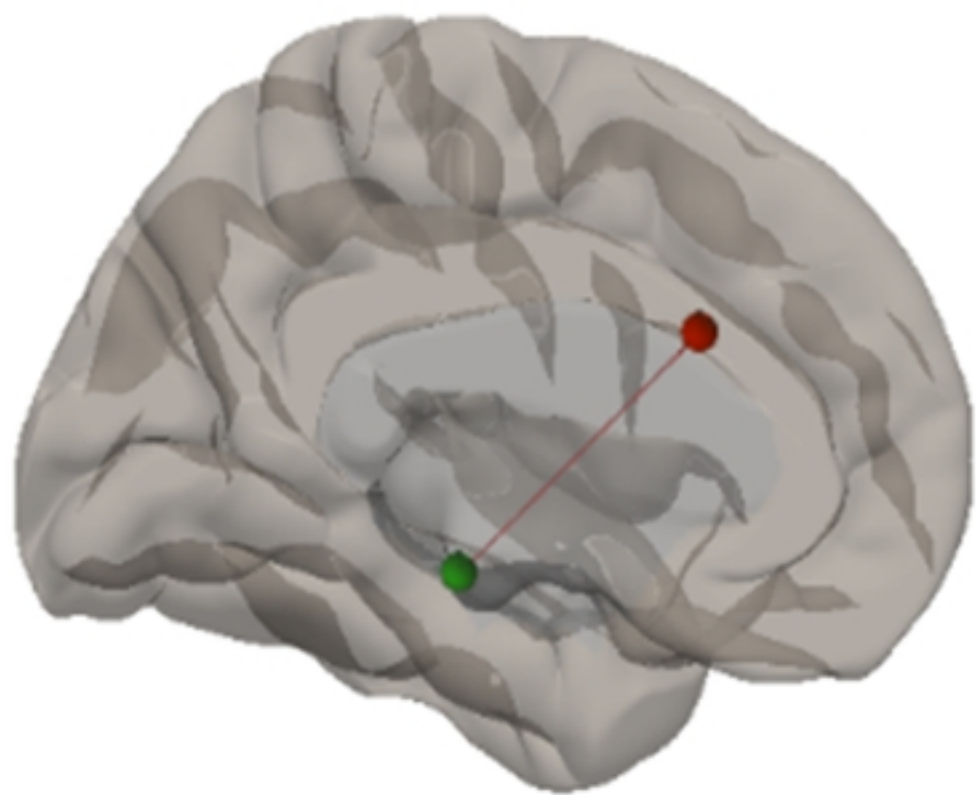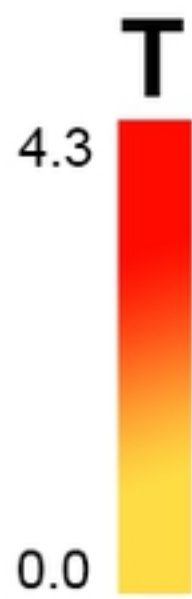

Figure

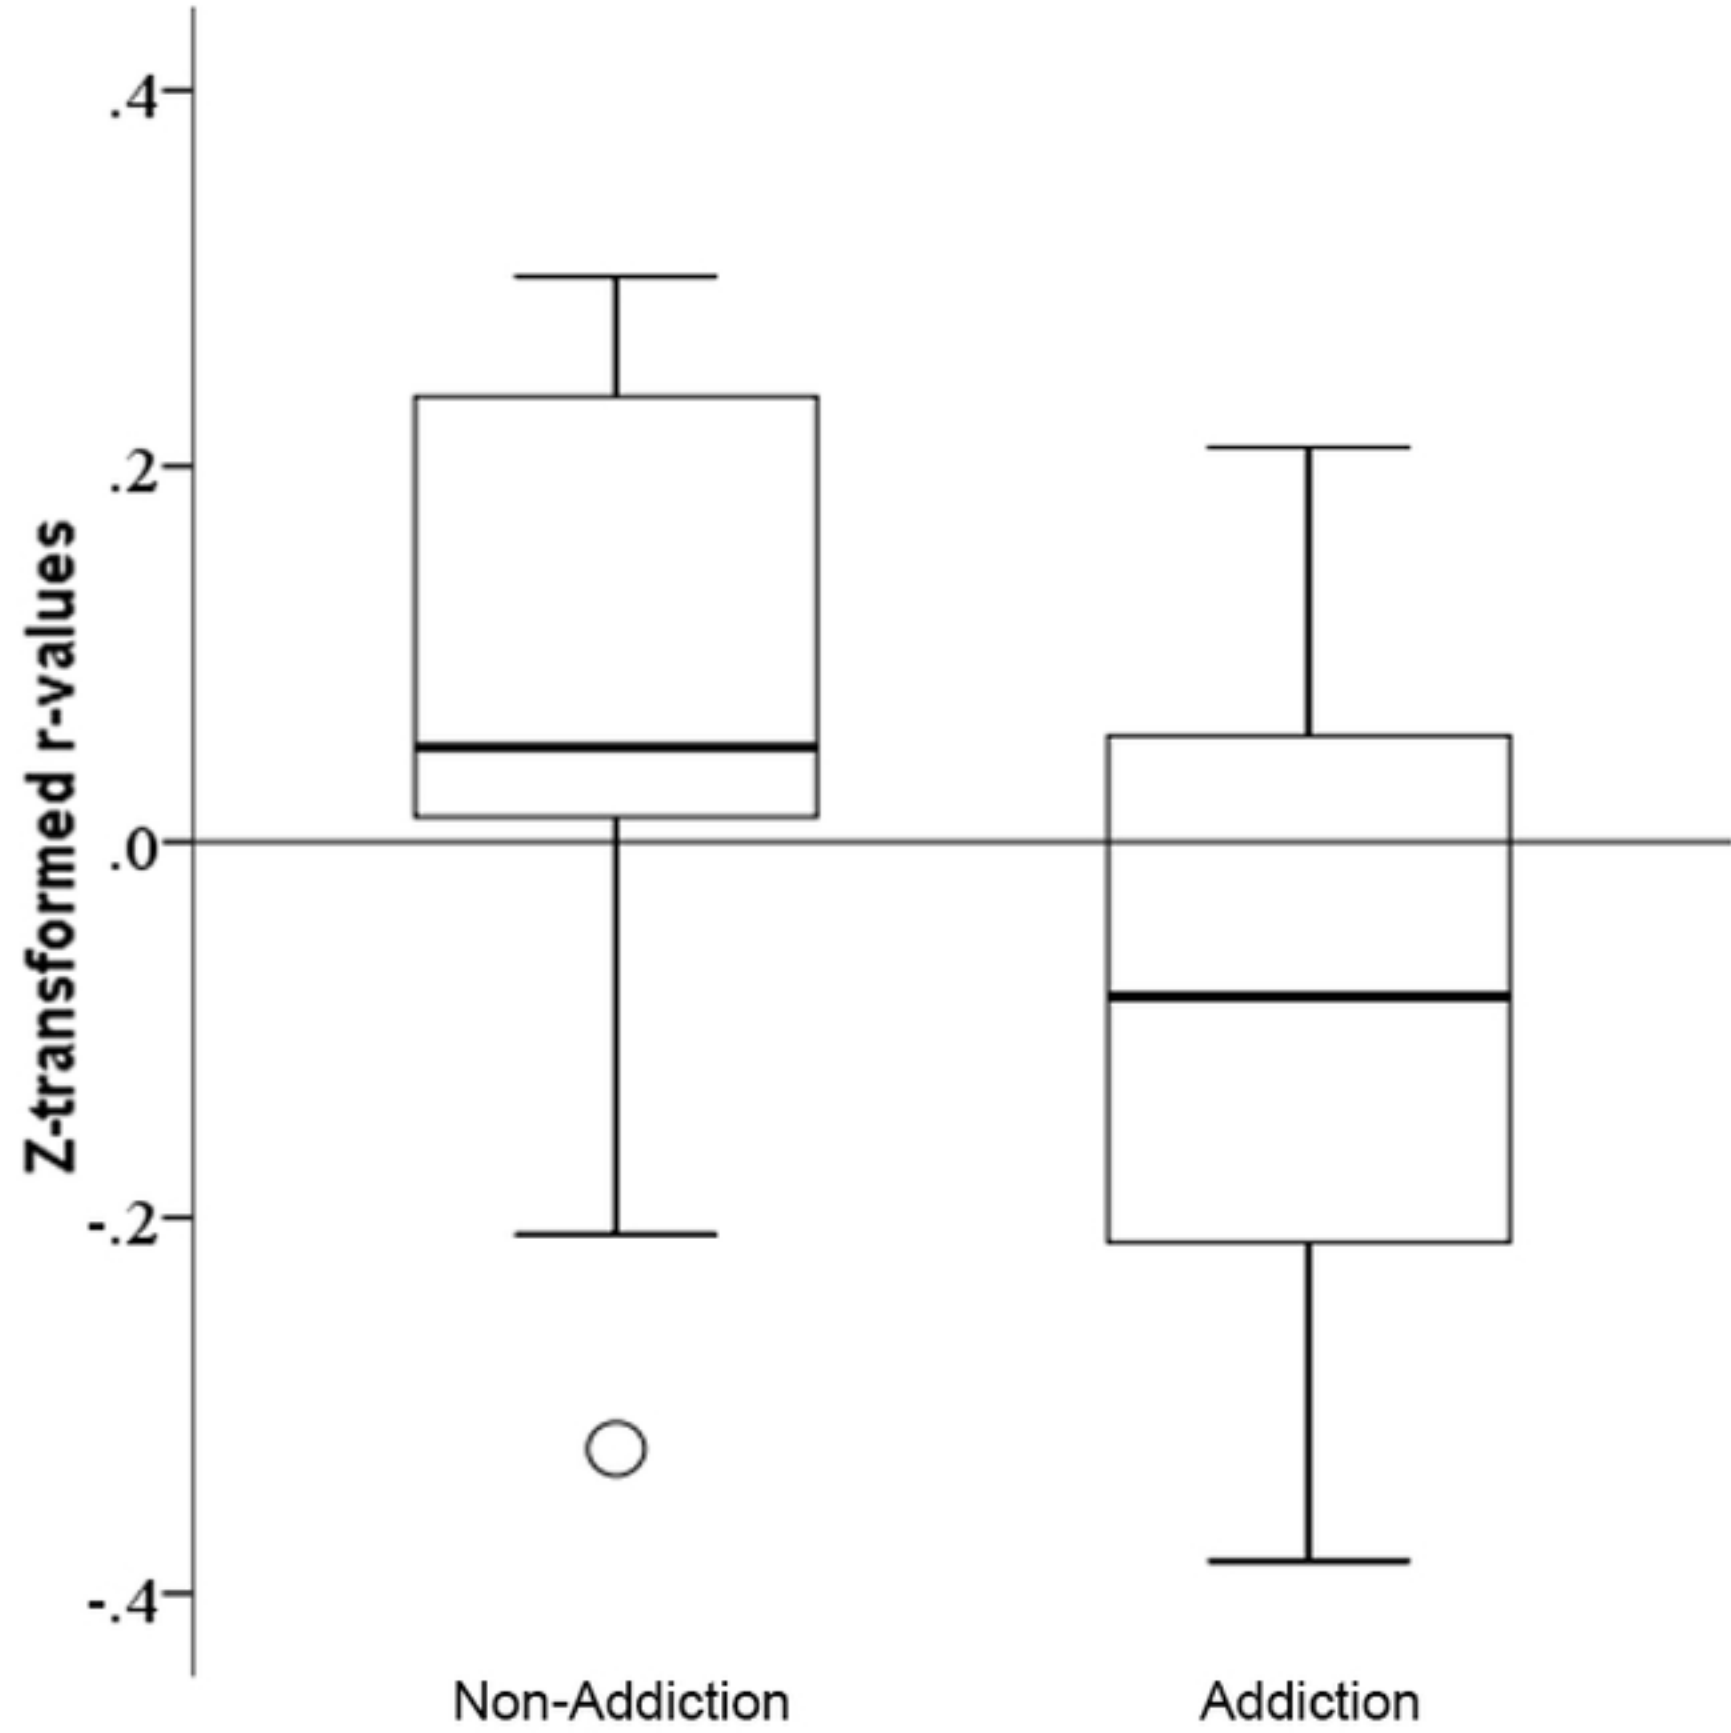

Figure 2

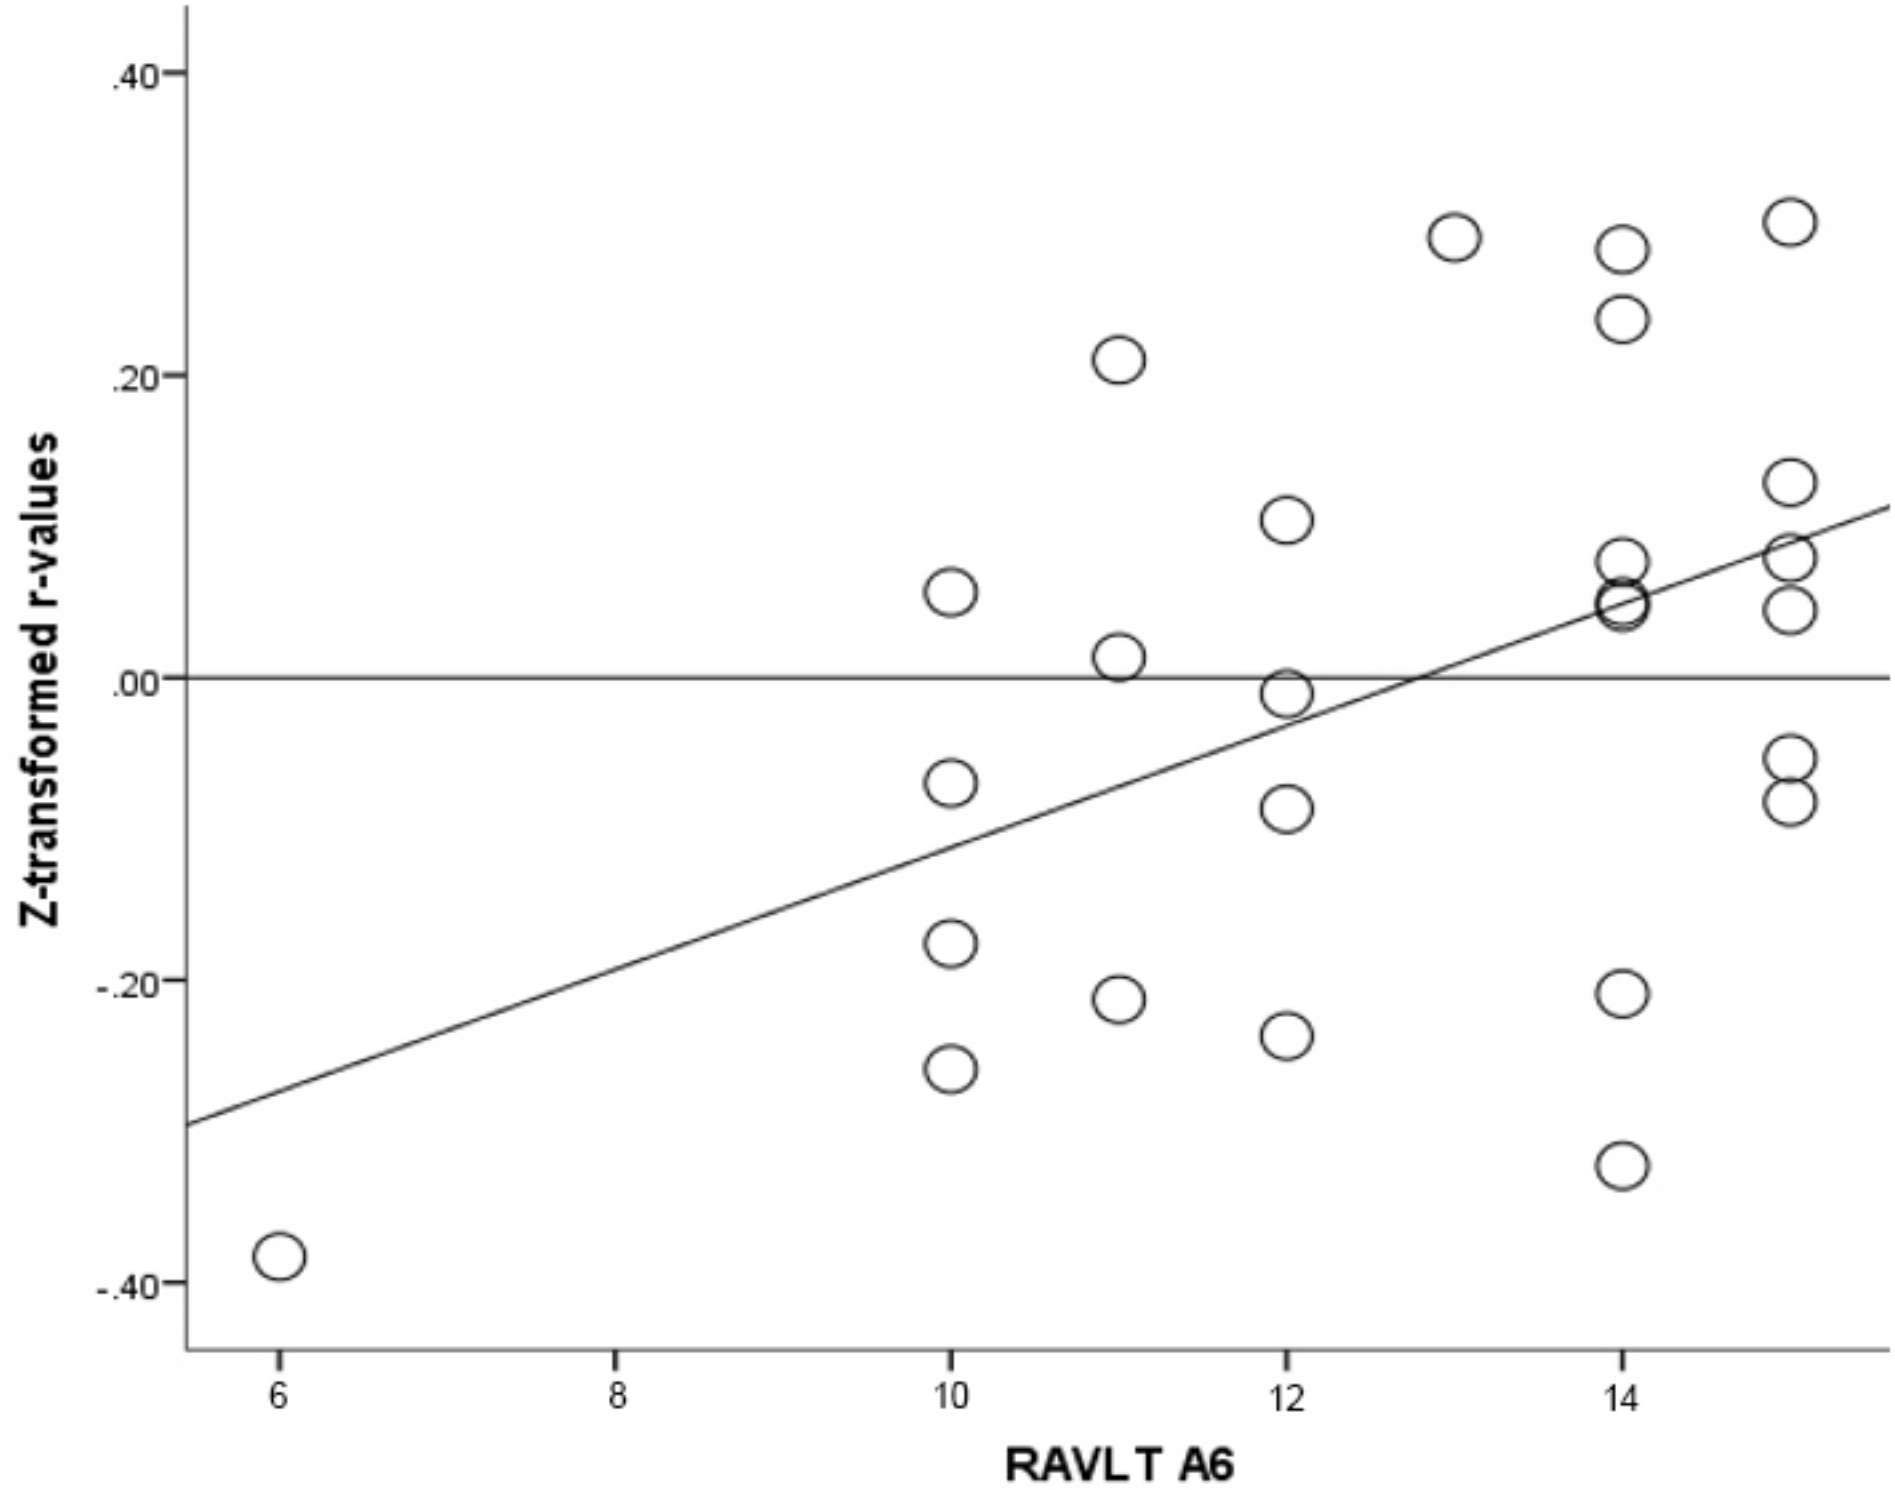

Figure 3
